# Supplementary material for: What Works in Violence Prevention Among Young People?: A Systematic Review of Reviews
Source: PubMed Central journal article supplement (PMC9606003; doi:10.1177/1524838020939130), 2020-07-17
Supplement: 0306_Supplementary_Material_Online.pdf [file 0306_Supplementary_Material_Online.pdf]

**Appendix A.** Search strategy.

***PsycInfo and PsycArticles***

((aggress\* or violen\* or sexual assault or bully\* or anti\* behav\* or abus\* or relationship violence or dating violence) and (intervention or program\* or training or reduc\* or prevent\* or campaign)).ti,ab. and (review\* or meta\* or analysis or meta-analysis or evaluat\*).ti. and (school or campus or university or college or youth or young or adolesc\* or teen\*).ti,ab.

***Sociology collection ProQuest***

ab(aggress\* or violen\* or sexual assault or bully\* or anti\* behav\* or abus\* or relationship violence or dating violence) and ab(intervention or program\* or training or reduc\* or prevention or campaign) and ti(review\* or meta\* or analysis or meta-analysis or evaluat\*) and ab(school or campus or college or university or youth or young or adolesc\* or teen\*)

***Medline***

((aggress\* or violen\* or sexual assault or bully\* or anti\* behav\* or abus\* or relationship violence or dating violence) and (intervention or program\* or training or reduc\* or prevent\* or campaign)).ti,ab. and (review\* or meta\* or analysis or meta-analysis or evaluat\*).ti. and (school or campus or university or college or youth or young or adolesc\* or teen\*).ti,ab.

***ERIC***

(AB aggress\* OR AB violen\* OR AB bully\* OR AB assault OR AB abus\* or AB anti\* behav\*) AND (AB program\* OR AB intervention OR AB campaign OR AB prevent\* OR AB reduc\* OR AB training) AND (AB school OR AB young OR AB campus OR AB teen\* OR AB university OR AB college) AND (TI review OR TI meta\* OR TI meta-analysis OR TI evaluat\* OR TI analysis)

**Appendix B. AMSTAR – 2 Quality appraisal results**

|    | AMSTAR 2 Criteria*                               | Anderson & Whiston (2005) | Atienzo, Baxter, & Kaltenthaler (2017) | Baldry & Farrington (2007) | Cassidy, Bowman, McGrath, & Matzopoulos (2016) | Cox et al. (2016) | DeKoker et al. (2013) | DeLaRue, Polanin, Espelage, & Piggott (2017) | DeGue et al. (2014) | Derzon (2006) | Edwards and Hinsz (2014) |
|----|--------------------------------------------------|---------------------------|----------------------------------------|----------------------------|------------------------------------------------|-------------------|-----------------------|----------------------------------------------|---------------------|---------------|--------------------------|
| 1  | Population, Intervention, Comparison and Outcome | Yes                       | Yes                                    | No                         | Yes                                            | Uncl              | Yes                   | Yes                                          | Yes                 | Yes           | Yes                      |
| 2  | Pre-registered protocol                          | No                        | Partial Yes                            | No                         | No                                             | No                | No                    | Yes                                          | No                  | No            | No                       |
| 3  | Study design criteria                            | Yes                       | Yes                                    | No                         | No                                             | No                | No                    | Yes                                          | Yes                 | No            | No                       |
| 4  | Comprehensive literature search                  | No                        | Partial Yes                            | No                         | Partial Yes                                    | No                | Partial Yes           | Partial Yes                                  | Partial Yes         | No            | No                       |
| 5  | Study selection in duplicate                     | No                        | Yes                                    | No                         | Yes                                            | Uncl              | Yes                   | Yes                                          | Yes                 | No            | No                       |
| 6  | Data extraction in duplicate                     | Yes                       | Yes                                    | No                         | Yes                                            | Uncl              | Yes                   | Yes                                          | Yes                 | No            | No                       |
| 7  | List of excluded studies                         | No                        | No                                     | No                         | Yes                                            | No                | No                    | Yes                                          | No                  | No            | No                       |
| 8  | Detail of included studies                       | No                        | Partial Yes                            | Partial Yes                | No                                             | Yes               | Partial Yes           | Partial Yes                                  | No                  | No            | No                       |
| 9  | Risk of Bias (RoB) in individual studies         | Uncl                      | Yes                                    | No                         | Uncl                                           | Uncl              | Partial Yes           | Partial Yes                                  | No                  | No            | No                       |
| 10 | Sources of funding                               | Uncl                      | No                                     | No                         | No                                             | No                | No                    | Yes                                          | No                  | No            | No                       |
| 11 | Meta-analysis – appropriate statistical methods  | No                        | Not performed                          | Not performed              | Not performed                                  | Not performed     | Not performed         | Yes                                          | Not performed       | No            | Yes                      |
| 12 | Meta-analysis – assess RoB                       | No                        | Not performed                          | Not performed              | Not performed                                  | Not performed     | Not performed         | Yes                                          | Not performed       | No            | No                       |
| 13 | Meta-analysis – incorporate RoB                  | No                        | Yes                                    | No                         | No                                             | No                | Yes                   | Yes                                          | No                  | No            | No                       |
| 14 | Explanation for any heterogeneity observed       | Yes                       | No                                     | No                         | No                                             | No                | No                    | No                                           | No                  | No            | Yes                      |
| 15 | Publication bias                                 | No                        | Not performed                          | Not performed              | Not performed                                  | Not performed     | Not performed         | Yes                                          | Not performed       | No            | No                       |
| 16 | Conflicts of interest reported                   | No                        | Yes                                    | No                         | Yes                                            | No                | No                    | Yes                                          | No                  | No            | Yes                      |

\* Critical points are highlighted with yellow

**Appendix B. AMSTAR – 2 Quality appraisal results - continued**

|    | AMSTAR 2 Criteria*                               | Fagan & Catalano (2013) | Fellmeth et al. (2013) | Ferguson & Kilburn (2003) | Fields & McNamara (2003) | Gavine, Donnelly, & Williams (2016) | Hahn et al. (2007) | Howard, Flora, & Griffin (1999) | Jiménez-Barbero et al. (2015) | Jouriles et al. (2018) | Katz & Moore (2013) |
|----|--------------------------------------------------|-------------------------|------------------------|---------------------------|--------------------------|-------------------------------------|--------------------|---------------------------------|-------------------------------|------------------------|---------------------|
| 1  | Population, Intervention, Comparison and Outcome | Yes                     | Yes                    | No                        | Uncl                     | Yes                                 | Yes                | Yes                             | Yes                           | Yes                    | Yes                 |
| 2  | Pre-registered protocol                          | No                      | Yes                    | No                        | No                       | No                                  | No                 | No                              | Partial Yes                   | No                     | No                  |
| 3  | Study design criteria                            | No                      | No                     | Uncl                      | No                       | No                                  | Yes                | Yes                             | Yes                           | No                     | Yes                 |
| 4  | Comprehensive literature search                  | Partial Yes             | Partial Yes            | No                        | Uncl                     | No                                  | Partial Yes        | Partial Yes                     | Partial Yes                   | Partial Yes            | Uncl                |
| 5  | Study selection in duplicate                     | No                      | Yes                    | No                        | Uncl                     | Uncl                                | Uncl               | No                              | Yes                           | No                     | No                  |
| 6  | Data extraction in duplicate                     | No                      | Yes                    | No                        | Uncl                     | Uncl                                | Yes                | No                              | No                            | uncl                   | No                  |
| 7  | List of excluded studies                         | No                      | Yes                    | No                        | No                       | No                                  | No                 | No                              | No                            | No                     | No                  |
| 8  | Detail of included studies                       | Partial Yes             | Partial Yes            | No                        | No                       | No                                  | No                 | Partial Yes                     | No                            | No                     | No                  |
| 9  | Risk of Bias (RoB) in individual studies         | No                      | Yes                    | Uncl                      | No                       | Partial Yes                         | No                 | Uncl                            | No                            | No                     | No                  |
| 10 | Sources of funding                               | No                      | No                     | No                        | No                       | No                                  | No                 | No                              | No                            | No                     | No                  |
| 11 | Meta-analysis – appropriate statistical methods  | Not performed           | Yes                    | No                        | No                       | Not performed                       | Yes                | Not performed                   | Yes                           | No                     | Yes                 |
| 12 | Meta-analysis – assess RoB                       | Not performed           | Yes                    | Uncl                      | No                       | Not performed                       | Yes                | Not performed                   | Yes                           | No                     | Yes                 |
| 13 | Meta-analysis – incorporate RoB                  | No                      | Yes                    | No                        | No                       | Yes                                 | Yes                | Uncl                            | Yes                           | No                     | Yes                 |
| 14 | Explanation for any heterogeneity observed       | No                      | Yes                    | No                        | No                       | Yes                                 | No                 | No                              | Yes                           | No                     | Yes                 |
| 15 | Publication bias                                 | Not performed           | Yes                    | Yes                       | No                       | Not performed                       | No                 | Not performed                   | Yes                           | No                     | No                  |
| 16 | Conflicts of interest reported                   | Yes                     | Yes                    | No                        | No                       | No                                  | Yes                | No                              | No                            | Uncl                   | No                  |

\* Critical points are highlighted with yellow

**Appendix B. AMSTAR – 2 Quality appraisal results - continued**

|    | AMSTAR 2 Criteria*                               | Kettrey & Marx (2018) | Lee, Kim, & Kim (2015) | Leen et al. (2013) | Limbos et al. (2007) | Lösel & Beelmann (2003) | Malhotra, Gonzalez-Guarda, & Mitchell (2015) | Nocentini, Zambuto, & Menesini (2016) | Park-Higgerson et al. (2008) | Petering, Wenzel, & Winetrobe (2014) | Polanin, Espelage, & Pigott (2012) |
|----|--------------------------------------------------|-----------------------|------------------------|--------------------|----------------------|-------------------------|----------------------------------------------|---------------------------------------|------------------------------|--------------------------------------|------------------------------------|
| 1  | Population, Intervention, Comparison and Outcome | Yes                   | Yes                    | Yes                | Yes                  | Yes                     | Yes                                          | Yes                                   | Yes                          | Yes                                  | Yes                                |
| 2  | Pre-registered protocol                          | Uncl                  | No                     | No                 | No                   | No                      | No                                           | No                                    | No                           | No                                   | No                                 |
| 3  | Study design criteria                            | Yes                   | No                     | No                 | No                   | No                      | No                                           | No                                    | Yes                          | No                                   | No                                 |
| 4  | Comprehensive literature search                  | Partial Yes           | No                     | No                 | No                   | No                      | Yes                                          | No                                    | No                           | Partial Yes                          | No                                 |
| 5  | Study selection in duplicate                     | Yes                   | Yes                    | Uncl               | No                   | No                      | Uncl                                         | Uncl                                  | No                           | Yes                                  | No                                 |
| 6  | Data extraction in duplicate                     | Yes                   | Yes                    | Uncl               | No                   | Yes                     | Yes                                          | Uncl                                  | Yes                          | Yes                                  | Yes                                |
| 7  | List of excluded studies                         | No                    | No                     | No                 | No                   | No                      | No                                           | Yes                                   | No                           | No                                   | No                                 |
| 8  | Detail of included studies                       | Partial Yes           | Partial Yes            | No                 | No                   | No                      | Partial Yes                                  | Yes                                   | Partial Yes                  | Partial Yes                          | No                                 |
| 9  | Risk of Bias (RoB) in individual studies         | No                    | No                     | No                 | Uncl                 | No                      | No                                           | No                                    | No                           | No                                   | No                                 |
| 10 | Sources of funding                               | No                    | No                     | No                 | No                   | No                      | No                                           | No                                    | No                           | No                                   | No                                 |
| 11 | Meta-analysis – appropriate statistical methods  | No                    | Yes                    | Not performed      | Not performed        | Yes                     | Not performed                                | Not performed                         | Yes                          | Not performed                        | No                                 |
| 12 | Meta-analysis – assess RoB                       | No                    | No                     | Not performed      | Not performed        | No                      | Not performed                                | Not performed                         | No                           | Not performed                        | No                                 |
| 13 | Meta-analysis – incorporate RoB                  | No                    | No                     | No                 | No                   | No                      | No                                           | No                                    | No                           | No                                   | No                                 |
| 14 | Explanation for any heterogeneity observed       | Yes                   | Yes                    | Uncl/No            | Yes                  | Yes                     | No                                           | No                                    | Yes                          | No                                   | Yes                                |
| 15 | Publication bias                                 | No                    | No                     | Not performed      | Not performed        | Yes                     | Not performed                                | Not performed                         | Yes                          | Not performed                        | Yes                                |
| 16 | Conflicts of interest reported                   | No                    | No                     | No                 | Yes                  | No                      | Yes                                          | No                                    | No                           | No                                   | No                                 |

\* Critical points are highlighted with yellow

**Appendix B. AMSTAR – 2 Quality appraisal results - continued**

|    | AMSTAR 2 Criteria*                                                     | Sawyer, Borduin, & Dopp (2015) | Scheckner et al. (2002) | Smith et al. (2004) | Storer, Casey, Herrenkohl (2016) | Ttofi & Farrington (2011) | Vreeman & Carroll (2007) | Whitaker et al. (2006) | Whitaker et al. (2013) | Wilson, Lipsey & Derzon (2003) | Wilson & Lipsey (2007) |
|----|------------------------------------------------------------------------|--------------------------------|-------------------------|---------------------|----------------------------------|---------------------------|--------------------------|------------------------|------------------------|--------------------------------|------------------------|
| 1  | Inclusion criteria<br>Population, Intervention, Comparison and Outcome | Yes                            | Yes                     | No                  | No                               | Yes                       | Uncl                     | Yes                    | Yes                    | Yes                            | Yes                    |
| 2  | Pre-registered protocol                                                | No                             | No                      | No                  | No                               | No                        | No                       | No                     | No                     | No                             | No                     |
| 3  | Study design criteria                                                  | No                             | Uncl                    | Yes                 | No                               | Yes                       | Uncl                     | No                     | No                     | No                             | Yes                    |
| 4  | Comprehensive literature search                                        | Partial Yes                    | Partial Yes             | Partial Yes         | No                               | Partial Yes               | Partial Yes              | No                     | Partial Yes            | No                             | No                     |
| 5  | Study selection in duplicate                                           | Yes                            | No                      | No                  | No                               | No                        | No                       | Yes                    | No                     | No                             | No                     |
| 6  | Data extraction in duplicate                                           | Yes                            | No                      | Yes                 | No                               | No                        | Yes                      | Yes                    | Yes                    | No                             | No                     |
| 7  | List of excluded studies                                               | No                             | No                      | No                  | No                               | No                        | No                       | No                     | No                     | No                             | No                     |
| 8  | Detail of included studies                                             | No                             | Partial Yes             | No                  | Partial Yes                      | No                        | Partial Yes              | Partial Yes            | Partial Yes            | No                             | No                     |
| 9  | Risk of Bias (RoB) in individual studies                               | No                             | No                      | No                  | No                               | No                        | No                       | No                     | No                     | No                             | No                     |
| 10 | Sources of funding                                                     | No                             | No                      | No                  | No                               | No                        | No                       | No                     | No                     | No                             | No                     |
| 11 | Meta-analysis – appropriate statistical methods                        | Yes                            | No                      | Not performed       | Not performed                    | No                        | Not performed            | Not performed          | Not performed          | No                             | Yes                    |
| 12 | Meta-analysis – assess RoB                                             | No                             | No                      | Not performed       | Not performed                    | No                        | Not performed            | Not performed          | Not performed          | Yes                            | No                     |
| 13 | Meta-analysis – incorporate RoB                                        | No                             | No                      | No                  | No                               | No                        | No                       | No                     | No                     | No                             | No                     |
| 14 | Explanation for any heterogeneity observed                             | Yes                            | No                      | No                  | No                               | No                        | No                       | No                     | No                     | No                             | Yes                    |
| 15 | Publication bias                                                       | Yes                            | No                      | Not performed       | Not performed                    | No                        | Not performed            | Not performed          | Not performed          | No                             | No                     |
| 16 | Conflicts of interest reported                                         | No                             | No                      | No                  | Yes                              | No                        | Yes                      | No                     | No                     | No                             | Yes                    |

\* Critical points are highlighted with yellow

**Appendix C.** Characteristics of the studies

| Authors                               | Type of review | No. of studies | Country                                              | Age          | Settings               | Behavior outcomes                            | Bystander component                  | Quality        | Type of violence | Effectiveness for behavior in populations 15-30 years old                                                                                              |
|---------------------------------------|----------------|----------------|------------------------------------------------------|--------------|------------------------|----------------------------------------------|--------------------------------------|----------------|------------------|--------------------------------------------------------------------------------------------------------------------------------------------------------|
| Baldry & Farrington (2007)            | Meta-analysis  | 16             | Australia<br>Europe<br>Canada<br>USA                 | 8 to 17      | School                 | Perpetration, victimization prevalence rates | Yes, but no reports on effectiveness | Critically Low | Bullying         | 3 programs demonstrated small effect on reduction of perpetration and victimization, 3 increased perpetration, and 2 increased victimization.          |
| Ferguson & Kilburn (2003)             | Meta-analysis  | 42 (45)        | Not specified                                        | School years | School                 | Nonviolent and violent bullying              | No                                   | Critically Low | Bullying         | Overall small positive effect but effect sizes too small to be noticeable (including 5 high school studies, age unclear)                               |
| Lee, Kim, & Kim (2015)                | Meta-analysis  | 13             | Australia<br>China<br>Europe<br>USA                  | 7 to 16      | School                 | Perpetration victimization observations      | No                                   | Critically Low | Bullying         | Small to moderate positive effects on victimization, including populations 15 years old (4)                                                            |
| Nocentini, Zambuto, & Menesini (2016) | Review         | 32             | Europe<br>USA                                        | School years | School                 | Perpetration victimization                   | Yes                                  | Critically Low | Bullying         | Positive effect for bullying (2 studies included population of interest)                                                                               |
| Polanin, Espelage, & Pigott (2012)    | Meta-analysis  | 11             | Europe<br>USA                                        | K to 18 y.o. | School                 | Bystander helping behaviors                  | Yes, and reports on effectiveness    | Critically Low | Bullying         | Small positive effect for bystander behavior across all studies; larger effect sizes for younger students. Shorter programs showed larger effect sizes |
| Smith et al. (2004)                   | Review         | 14             | Europe<br>USA                                        | School years | School, parent         | Perpetration victimization                   | No                                   | Critically Low | Bullying         | Small negligible effect (3), mixed/harmful effect for perpetration or victimization (2)                                                                |
| Ttofi & Farrington (2011)             | Meta-analysis  | 44 (89)        | Europe<br>North America                              | 7 to 18      | School                 | Perpetration victimization                   | No                                   | Critically Low | Bullying         | Evidence of effectiveness for perpetration and victimization for 11 years and older                                                                    |
| Vreeman & Carroll (2007)              | Review         | 26 (56)        | Australia<br>Europe<br>North America<br>South Africa | 7 to 18      | School, not limited to | Perpetration victimization                   | No                                   | Critically Low | Bullying         | Harmful effects (1 increased perpetration and victimization), significant reductions in perpetration and victimization (1), no significant changes (1) |

**Appendix C.** Characteristics of the studies (continued)

| Authors                                      | Type of review | No. of studies | Country                    | Age          | Settings                  | Behavior outcomes                                                            | Bystander component                  | Quality        | Type of violence        | Effectiveness for behavior in populations 15-30 years old                                                                                                                                                    |
|----------------------------------------------|----------------|----------------|----------------------------|--------------|---------------------------|------------------------------------------------------------------------------|--------------------------------------|----------------|-------------------------|--------------------------------------------------------------------------------------------------------------------------------------------------------------------------------------------------------------|
| DeKoker et al. (2013)                        | Review         | 6 (8)          | USA, Canada, South Africa  | 11 to 26     | School, community         | Physical and psychological perpetration, victimization, prevalence rates     | Yes, but no reports on effectiveness | Critically Low | Dating and relationship | Significant positive effect for perpetration (3), no effect (2)                                                                                                                                              |
| DeLaRue, Polanin, Espelage, & Piggott (2017) | Meta-analysis  | 23             | USA, Canada                | 11 to 18     | School                    | Perpetration victimization                                                   | Yes, but limited data                | High           | Dating and relationship | Small nonsignificant effect on perpetration (2) and small significant effect on victimization (unclear/none for 15 and older) was found, however, effect sizes decreased to null at follow-up.               |
| Edwards and Hinsz (2014)                     | Meta-analysis  | 8              | Not specified              | School years | School                    | Self-reported behaviors, prevalence rates                                    | No                                   | Critically Low | Dating and relationship | Small positive effect (overall, not specified for behaviors), interestingly, small harmful effect on attitudes (2)                                                                                           |
| Fellmeth et al. (2013)                       | Meta-analysis  | 38             | USA South Korea            | 12 to 25     | School, university        | Perpetration, victimization, bystander, prevalence rates                     | Yes, but no reports on effectiveness | Moderate       | Dating and relationship | No statistically significant effect                                                                                                                                                                          |
| Leen et al. (2013)                           | Review         | 9              | Europe North America       | 12 to 18     | School, not limited to    | Perpetration, victimization, negative dating behavior, substance, condom use | No                                   | Critically Low | Dating and relationship | Small positive effect for negative dating behavior (1)                                                                                                                                                       |
| Malhotra, Gonzalez-Guarda, & Mitchell (2015) | Review         | 18 (22)        | Canada, USA, not specified | School years | School, family, community | Perpetration victimization                                                   | Yes                                  | Critically Low | Dating and relationship | Positive effect decreased over time in several programs; harmful effect or perpetration (1); positive effect maintained at a 4-year follow-up (1); positive effect on victimization but not perpetration (1) |

**Appendix C.** Characteristics of the studies (continued)

| Authors                              | Type of review | No. of studies | Country                           | Age           | Settings                  | Behavior outcomes                                                   | Bystander component               | Quality        | Type of violence        | Effectiveness for behavior in populations 15-30 years old                                                                                                                                                                                                     |
|--------------------------------------|----------------|----------------|-----------------------------------|---------------|---------------------------|---------------------------------------------------------------------|-----------------------------------|----------------|-------------------------|---------------------------------------------------------------------------------------------------------------------------------------------------------------------------------------------------------------------------------------------------------------|
| Petering, Wenzel, & Winetrobe (2014) | Review         | 14             | USA, Canada                       | 12 to 26      | School, not limited to    | Victimization<br>Perpetration,<br>bystander behavior,<br>condom use | Yes                               | Critically Low | Dating and relationship | Positive effects in 3 programs for perpetration and victimization, condom use (1); 1 program effective for bystander behavior in athletes                                                                                                                     |
| Storer, Casey, Herrenkohl (2016)     | Review         | 9 (15)         | USA, not specified                | College years | College                   | Bystander behavior                                                  | Yes                               | Critically Low | Dating and relationship | Small but significant effect on bystander behavior (4); no effect (2); mixed effect (3). Perpetration or victimization not measured.                                                                                                                          |
| Whitaker et al. (2006)               | Review         | 11             | Not specified                     | School years  | School community          | Perpetration<br>Victimization<br>Psychological perpetration         | No                                | Critically Low | Dating and relationship | Small improvement for perpetration and victimization in 1 study, including a 4-year follow-up (up to 14 years old); small decreases in physical perpetration in 1 program (effect larger for girls); 2 studies reported no or negligible effect for behavior. |
| Whitaker et al. (2013)               | Review         | 19             | South Africa, USA, not specified, | School years  | School and other settings | Perpetration<br>Victimization                                       | No                                | Critically Low | Dating and relationship | Small improvement for perpetration and victimization in 1 study, including a 4-year follow-up (population up to 14 years old)                                                                                                                                 |
| Anderson & Whiston (2005)            | Meta-analysis  | 102 (69)       | USA                               | Mean age 20   | School                    | Perpetration<br>Victimization                                       | No                                | Critically Low | Sexual assault          | No significant effect on behavior                                                                                                                                                                                                                             |
| DeGue et al. (2014)                  | Review         | 140            | Not specified                     | 10 to 47      | School, college           | Perpetration<br>victimization,<br>bystander behavior                | Yes, and reports on effectiveness | Critically Low | Sexual assault          | Positive effect for perpetration and victimization (1); positive effects on perpetration (1); mixed results for bystander behavior (1, unclear); harmful effect for college men (1)                                                                           |
| Jouriles et al. (2018)               | Review         | 24             | Not specified                     | Undergraduate | College                   | Bystander behavior                                                  | Yes, and reports on effectiveness | Critically Low | Sexual assault          | Small significant effect for bystander behavior that decreased at follow-up; perpetration and victimization not reported                                                                                                                                      |



**Appendix C.** Characteristics of the studies (continued)

| Authors                             | Type of review | No. of studies | Country                              | Age                  | Settings                  | Behavior outcomes                                             | Bystander component               | Quality        | Type of violence | Effectiveness for behavior in populations 15-30 years old                                                                                                                         |
|-------------------------------------|----------------|----------------|--------------------------------------|----------------------|---------------------------|---------------------------------------------------------------|-----------------------------------|----------------|------------------|-----------------------------------------------------------------------------------------------------------------------------------------------------------------------------------|
| Katz & Moore (2013)                 | Meta-analysis  | 12             | Not specified                        | Avg 19               | College                   | Perpetration, bystander behavior                              | Yes, and reports on effectiveness | Critically Low | Sexual assault   | Moderate effects for bystander behavior, no effects for perpetration                                                                                                              |
| Kettrey & Marx (2018)               | Meta-analysis  | 15             | Not specified                        | College              | College                   | Bystander behavior                                            | Yes, and reports on effectiveness | Critically Low | Sexual assault   | Small significant positive effect for bystander behavior; perpetration and victimization not reported                                                                             |
| Derzon (2006)                       | Meta-analysis  | 83             | Not specified                        | 5 to 18              | School                    | Aggression, perpetration, criminal behavior, prevalence rates | No                                | Critically Low | Antisocial       | Positive effects for antisocial and aggressive behavior, however, it was unclear for which age groups                                                                             |
| Fields & McNamara (2003)            | Meta-analysis  | Uncl.          | Not specified                        | Youth, not specified | School community facility | Aggression, perpetration and victimization, prevalence rates  | No                                | Critically Low | Antisocial       | Significant positive effects in primary 3 studies compared to control groups (however outcome measures, as well as populations were unclear)                                      |
| Gavine, Donnelly, & Williams (2016) | Review         | 16 (21)        | Not specified                        | 11 to 18             | School                    | Aggression, perpetration, victimization, prevalence rates     | No                                | Critically Low | Antisocial       | Significant positive effect on violence rates, and victimization; significantly lesser increase in violence rates(1); no effect (1)                                               |
| Lösel & Beelmann (2003)             | Meta-analysis  | 84             | Australia<br>Canada<br>Europe<br>USA | 4 to 18              | School, not limited to    | Perpetration<br>Victimization                                 | No                                | Critically Low | Antisocial       | Small significant positive effect overall across studies                                                                                                                          |
| Park-Higgerson et al. (2008)        | Meta-analysis  | 26             | USA                                  | 1st Grade to 17 y.o. | School                    | Perpetration<br>Victimization                                 | No                                | Critically Low | Antisocial       | Moderate effect for antisocial behavior that remained at a 4-year follow-up; however, it was unclear how many preventive programs were school-based and focused on our target age |

**Appendix C.** Characteristics of the studies (continued)

| Authors                                        | Type of review | No. of studies | Country                    | Age              | Settings                        | Behavior outcomes                                  | Bystander component | Quality        | Type of violence                                       | Effectiveness for behavior in populations 15-30 years old                                                                                                                         |
|------------------------------------------------|----------------|----------------|----------------------------|------------------|---------------------------------|----------------------------------------------------|---------------------|----------------|--------------------------------------------------------|-----------------------------------------------------------------------------------------------------------------------------------------------------------------------------------|
| Sawyer, Borduin, & Dopp (2015)                 | Meta-analysis  | 66             | Not specified              | Birth to 17 y.o. | School community parent         | Perpetration<br>Victimization                      | No                  | Critically Low | Antisocial                                             | Moderate effect for antisocial behavior that remained at a 4-year follow-up; however, it was unclear how many preventive programs were school-based and focused on our target age |
| Wilson, Lipsey & Derzon (2003)                 | Meta-analysis  | 221 (362)      | USA, not specified         | School years     | School                          | Perpetration<br>Victimization                      | No                  | Critically Low | Antisocial                                             | Small positive effect for antisocial behavior overall; larger effects in populations with higher prevalence of violence, including high school sample                             |
| Wilson & Lipsey (2007)                         | Meta-analysis  | 249            | Australia, Canada, UK, USA | School years     | School                          | Perpetration<br>Victimization                      | No                  | Critically Low | Antisocial                                             | Small positive effect for antisocial behavior overall, including high school sample (those 14 years and older).                                                                   |
| Atienzo, Baxter, & Kaltenthaler (2017)         | Review         | 10 (9)         | Latin America              | 10 to 24         | School, favela, gang, community | Perpetration, witnessed violence, prevalence rates | No                  | Low            | General: bullying, antisocial behavior                 | Small reductions in witnessed bullying (1), small reductions in perpetration and witnessing antisocial behaviors among peers (1), increased involvement in deviant activities (1) |
| Cassidy, Bowman, McGrath, & Matzopoulos (2016) | Review         | 6              | Europe and USA             | 10 to 29         | School, university              | Perpetration<br>Victimization                      | No                  | Critically Low | General: antisocial, sexual assault                    | Small positive effect in 6 programs for populations including 15 years and older, perpetration and victimization                                                                  |
| Cox et al. (2016)                              | Review         | 17 (19)        | Australia                  | 12 to 18         | School, community               | Perpetration<br>Victimization                      | No                  | Critically Low | General: bullying, substance abuse related, antisocial | Antisocial - significant positive effect for physical violence (1); substance abuse: no report of effectiveness for age >15; bullying: small reductions in small sample (1)       |

**Appendix C.** Characteristics of the studies (continued)

| Authors                         | Type of review | No. of studies | Country               | Age          | Settings                      | Behavior outcomes                                                                                  | Bystander component | Quality        | Type of violence                                    | Effectiveness for behavior in populations 15-30 years old                                                                                                                                                                |
|---------------------------------|----------------|----------------|-----------------------|--------------|-------------------------------|----------------------------------------------------------------------------------------------------|---------------------|----------------|-----------------------------------------------------|--------------------------------------------------------------------------------------------------------------------------------------------------------------------------------------------------------------------------|
| Fagan & Catalano (2013)         | Review         | 17             | Not specified         | School years | School community family other | Perpetration, violence rates, fighting rates                                                       | No                  | Critically Low | General: antisocial relationship substance abuse    | Small to moderate positive effects for dating violence and bullying (2), with long term effects up to 3 years; substance abuse: no report of effectiveness for age 15                                                    |
| Hahn et al. (2007)              | Meta-analysis  | 53             | High-income countries | Students     | School, other                 | Perpetration, victimization, substance abuse-related harms                                         | No                  | Critically Low | General: bullying relationship substance antisocial | Small positive effect at all levels for substance abuse-related harms, bullying, relationship violence, and antisocial behavior, but not maintained at follow-up. Larger effect sizes for dating and antisocial behavior |
| Howard, Flora, & Griffin (1999) | Review         | 44             | US                    | School years | School                        | Aggression, shy behavior, perpetration victimization, fight-related nurse visits, suspension rates | No                  | Critically Low | General: bullying, relationship antisocial          | Bullying - small positive effect, no effect compared with control, effect only for boys (2); dating violence: only changes for attitudes measured (1)                                                                    |
| Jiménez-Barbero et al. (2015)   | Meta-analysis  | 14             | Australia EuropeU SA  | 7 to 16      | School                        | Aggression, perpetration Victimization substance abuse-related harms, frequency                    | No                  | Critically Low | General: bullying, substance, antisocial            | Small positive effect for substance abuse-related harms in 2 programs                                                                                                                                                    |
| Limbos et al. (2007)            | Review         | 41             | Not specified         | 12 to 17     | School, community facility    | Perpetration, substance abuse related harms                                                        | No                  | Critically Low | General: antisocial relationship substance abuse    | Not effective for ages 15 and older                                                                                                                                                                                      |
| Scheckner et al. (2002)         | Meta-analysis  | 16             | Not specified         | School years | School, community parent      | Perpetration and victimization                                                                     | No                  | Critically Low | General: antisocial substance abuse                 | No effectiveness (negligible results) in 2 studies                                                                                                                                                                       |
